# Supplementary material for: Real-time isothermal DNA amplification monitoring in picoliter volumes using an optical fiber sensor
Source: Royal Society of Chemistry journal article supplement (doi:10.1039/d0lc01069c), 2020-11-26
Supplement: d0lc01069c1.pdf [file d0lc01069c1.pdf]

## Supplementary materials for:

### **Real-time isothermal DNA amplification monitoring in picoliter volumes using optical fiber sensor.**

Monika Janik <sup>1,2,\*</sup>, ‡, Seyed Vahid Hamidi<sup>3</sup>, ‡, Marcin Koba <sup>1,4</sup>, Jonathan Perreault <sup>3</sup>, Ryan Walsh <sup>3</sup>, Wojtek J. Bock <sup>5</sup>, Mateusz Śmietana <sup>1</sup>

<sup>1</sup> Warsaw University of Technology, Institute of Microelectronics and Optoelectronics, Koszykowa 75, 00-662, Warszawa, Poland

<sup>2</sup> Gdansk University of Technology, Faculty of Electronics, Telecommunications, and Informatics, Department of Metrology and Optoelectronics, Narutowicza 11/12, 80-233 Gdansk

<sup>3</sup> INRS Centre Armand-Frappier Santé Biotechnologie, 531 boulevards des Prairies Laval (QC) Canada

<sup>4</sup> National Institute of Telecommunications, Szachowa 1, 04-894, Warszawa, Poland

<sup>5</sup> Photonic Research Centre, University of Quebec in Outaouais, 101 rue Saint-Jean-Bosco, Gatineau (QC), Canada

‡These two authors contributed equally as first authors in this article.

## Experimental work.

To visualize the presence of DNA resulting from RCA reactions we have performed another test using SYBR Green that confirmed our functionalization, amplification, and thus detection method.

### RCA reaction on a glass slide

Glass slides were functionalized with DBCO modified primers using the same procedure used to functionalize the optical fibers with the following exceptions, the 2 hours curing step at 105°C was omitted, RCA reactions were performed in a final volume of 30  $\mu$ L by including different concentrations of c-PLP, L-PLP (linear PLP), and no PLP (depending on the reaction) with a final concentration of 416  $\mu$ M deoxyribonucleotide triphosphate (dNTP) (Thermo Fisher Scientific, USA), 1X Phi29 DNA polymerase buffer (NEB), 30  $\mu$ g bovine serum albumin – BSA (NEB), 8 units of Phi29 DNA polymerase (NEB) and a final concentration of 1x SYBR Green dye (Invitrogen, USA) which becomes fluorescent upon binding dsDNA. The reactions were placed on functionalized glass slides at room temperature for 90 mins and then glass surfaces were scanned with a Typhoon FLA 9500 biomolecular imager (GE Healthcare) to visualize the presence of the dsDNA resulting from the HRCA reactions.

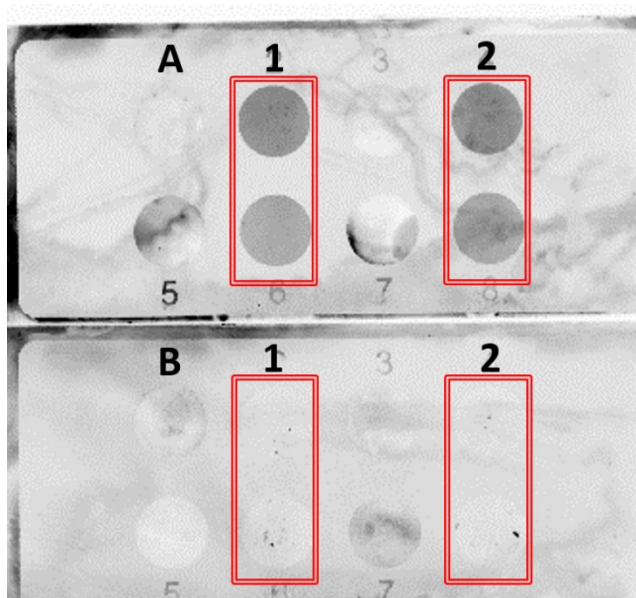

**Figure S1.** Visualization of the RCA reaction on a glass slide using SYBR Green. (A) Positive controls. A1 and A2, RCA reaction in the presence of 50 nM and 10 nM of c-PLP, respectively. (B) Negative controls. B1 and B2: RCA reaction in the absence of PLP and the presence of 50 nM of L-PLP (non-circularized PLP), respectively.
